# Supplementary material
Source: Elsevier journal article supplement (https://git.physik.uzh.ch/gitbucket/mchrzasz/Lecture_repo/raw/dcd70445dda3e5170ea78b059ea4ec30a245ccbc/Lectures_others/MC/W_Placzek_2010/mmc05.pdf)
Supplement: mmc05 [file mmc05.pdf]

# Testowanie generatorów liczb losowych

- Metodologia testowania generatorów liczb losowych
- Testy zgodności z rozkładem równomiernym.
- Testy zgodności rozkładów statystyk.
- Testy serii.
- Testy kombinatoryczne.
- Testowanie za pomocą zadań kontrolnych.

⇒ <http://th-www.if.uj.edu.pl/~placzek/dydaktyka/MMC/>

“Random number generators should not be chosen at random.”

Donald E. Knuth

## Jak sprawdzić czy dany generator jest dobry?

- ▶ Generator jest dobry jeśli daje sekwencje liczb, które posiadają własności liczb prawdziwie losowych. ← Jak to sprawdzić?
- Podejście tradycyjne:  
Sformułować pewne **własności** liczb losowych o rozkładzie równomiernym między 0 a 1, tzn.  $r \in \mathcal{U}(0, 1)$ , i sprawdzić – przez wykonanie odpowiednich **testów** – czy sekwencje liczb z danego generatora posiadają te własności.  
→ Ale można sformułować nieskończoną liczbę takich własności  $\Rightarrow$  nieskończona liczba testów!
- ▷ W praktyce można jedynie udowodnić, że generator jest zły (nie spełnia pewnych testów), ale nie można udowodnić, że generator jest dobry (fakt, iż przeszedł pomyślnie  $n$  testów nie daje gwarancji, że przejdzie  $(n + 1)$ -szy test, którym akurat może być nasz rowiązywany problem!).
- ▶ Testowanie generatorów → selekcja negatywna:  
Pomyślnie przejście pewnej liczby testów tylko zwiększa nasze zaufanie do danego generatora, ale nie daje nam pewności co do jego zupełnie niezawodności!

- Typowy schemat testowania generatora liczb losowych o rozkładzie  $\mathcal{U}(0, 1)$ :

1. Startując z **losowo** wybranej liczby początkowej generujemy  $n$  kolejnych liczb ( $n$  – ustalone).
2. Obliczamy wartość pewnej statystyki testowej  $T$ .
3. Obliczamy  $F(T)$ , gdzie  $F$  jest dystrybuantą statystyki  $T$ , gdy hipoteza jest prawdziwa.
4. Powtarzamy powyższą operację  $N$  razy, obliczając w kolejnych krokach wartości statystyki:  
 $T_1, T_2, \dots, T_N$  oraz wartości:  $F(T_1), F(T_2), \dots, F(T_N)$ .

Jeżeli weryfikowana hipoteza jest prawdziwa, to  $F(T_1), F(T_2), \dots, F(T_N)$  jest ciągiem niezależnych zmiennych losowych o jednakowym rozkładzie  $\mathcal{U}(0, 1)$ . Testowanie generatora kończymy testowaniem tej hipotezy (na określonym **poziomie istotności**).

- ▶ **Do dziś sformułowano wiele różnorodnych i surowych testów:**

- ▷ Patrz np. Donald E. Knuth, „Sztuka programowania”, tom 2, WNT 2002.
- ▷ Np. Bateria testów DIEHARD G. Marsaglia (<http://www.stat.fsu.edu/pub/diehard/>)  
– pomogła wyeliminować wiele złych generatorów liczb losowych, w tym fizycznych.

- Nowe (niestandardowe) podejście – M. Lüscher (1993):

Użycie formalizmu stosowanego przy opisie chaotycznego zachowania w klasycznych układach dynamicznych do badania oraz konstrukcji generatorów liczb losowych (patrz poprzedni wykład).

- ▶ Generator **RANLUX** – spełnia wymagania „chaotyczności” według powyższego formalizmu.

- ▷ Spełnia też wszystkie znane testy statystyczne – nie bez powodu!

## Test chi-kwadrat

Przedział  $[0, 1)$  dzielimy na  $k$  podprzedziałów:  $0 = a_0 < a_1 < \dots < a_k = 1$ .

Niech  $n_i$  – liczba elementów ciągu  $\{X_1, \dots, X_n\}$  należących do przedziału  $[a_{i-1}, a_i)$ ,

a  $p_i \equiv P\{a_{i-1} \leq X < a_i\} = a_i - a_{i-1}$ , ( $i = 1, \dots, k$ ) dla rozkładu  $\mathcal{U}(0, 1)$ .

⇒ Zmienna losowa:

$$\chi_{k-1}^2 = \sum_{i=1}^k \frac{(n_i - np_i)^2}{np_i}, \quad n = \sum_{i=1}^k n_i,$$

ma rozkład  $\chi^2$  (chi-kwadrat) o  $(k - 1)$  stopniach swobody.

▷ Wartość powyższej statystyki → weryfikacja hipotezy, że:  $X_1, \dots, X_n \in \mathcal{U}(0, 1)$ .

► Uproszczenie:  $p_i \equiv a_i - a_{i-1} = p_j \equiv a_j - a_{j-1} = \frac{1}{k}$ ,  $i, j = 1, \dots, k$  (równy podział):

$$\chi_{k-1}^2 = \frac{k}{n} \sum_{i=1}^k n_i^2 - n.$$

¶ **Dygresja – rozkład  $\chi^2$** :  $X \in \mathbb{R}$ ,  $X > 0$ ,  $N \in \mathbb{N}$ , ( $N$  – liczba „stopni swobody”),

Gęstość prawdop.:  $\rho(X) = \frac{1}{2} \left(\frac{X}{2}\right)^{\frac{N}{2}-1} e^{-\frac{X}{2}} \left[\Gamma\left(\frac{N}{2}\right)\right]^{-1}$ ;  $E(X) = N$ ,  $V(X) = 2N$ .

Jeżeli  $X_1, \dots, X_N$  – niezależne zmienne o rozkładzie normalnym  $N(0, 1)$ ,

to  $S_N = \sum_{i=1}^N X_i^2$  ma rozkład  $\chi_N^2$  o  $N$  stopniach swobody.

## Test zgodności z rozkładem wielowymiarowym

- Z kolejnych liczb otrzymywanych z generatora tworzymy wektory (punkty)  $m$ -wymiarowe:

$(X_1, X_2, \dots, X_m), (X_{m+1}, X_{m+2}, \dots, X_{2m}), \dots, (X_{(n-1)m+1}, X_{(n-1)m+2}, \dots, X_{nm})$

→ powinny mieć rozkład równomierny na kostce  $(0, 1)^m$ .

Każdy przedział  $(0, 1)$  dzielimy na  $k$  równych podprzedziałów:  $([j-1]/k, j/k)$ ,  $j = 1, \dots, k$ .

→ Tzn. kostkę dzielimy na  $k^m$  jednakowych kostek o objętościach  $k^{-m}$ .

Niech  $n_i$  – liczba  $m$ -wymiarowych punktów, które wpadły do  $i$ -tej kostki  $\Rightarrow$  **statystyka testu  $\chi^2$** :

$$\chi_{k^m-1}^2 = \frac{k^m}{n} \sum_{i=1}^{k^m} n_i^2 - n, \quad n = \sum_{i=1}^{k^m} n_i.$$

- Postępujemy jak wyżej, ale tworzymy  $m$ -wymiarowe punkty z nakładającymi się współrzędnymi:

$(X_1, X_2, \dots, X_m), (X_2, X_3, \dots, X_{m+1}), (X_3, X_4, \dots, X_{m+2}), \dots$

→ Dla  $N$  liczb losowych mamy  $N - m + 1$  takich punktów.

Definiujemy statystyki:

$$\psi_0^2 = 0, \quad \psi_m^2 = \sum_{i=1}^{k^m} \frac{[n_i - (N - m + 1)/k^m]^2}{(N - m + 1)/k^m}, \quad m = 1, 2, \dots$$

- ▶ Dla „dostatecznie dużych”  $N$  zmienna losowa  $(\psi_m^2 - \psi_{m-1}^2)$  ma w przybliżeniu rozkład chi-kwadrat o  $(k^m - k^{m-1})$  stopniach swobody.

## Test OPSO (ang. *overlapping-pairs-sparse-occupancy*)

- ▶ Test OPSO (G. Marsaglia, 1984) dotyczy analizy częstości nakładających się par liczb otrzymywanych z generatora.

Niech:  $X_1, X_2, \dots, X_n$  – ciąg liczb ciąg liczb z generatora. Z każdej liczby weźmy  $b$  bitów (np. najbardziej znaczących) i skonstruujmy ciąg liczb  $I_1, I_2, \dots, I_n$ , gdzie  $I_j \in \{0, 1, \dots, 2^b - 1\}$ .

Następnie utwórzmy ciąg kolejnych nakładających się par:

$$(I_1, I_2), (I_2, I_3), \dots, (I_{n-1}, I_n).$$

Niech  $Y$  – liczba takich par ze zbioru  $\{(i, j) : i, j = 0, \dots, 2^b - 1\}$ , które **nie pojawiły się** w powyższym ciągu.

- ▶ Zmienna losowa  $Y$  ma asymptotycznie ( $n \rightarrow \infty$ ) rozkład normalny  $N(\mu, \sigma)$ .

Przykładowe parametry dla testu OPSO:

| $b$ | $n$      | $\mu$     | $\sigma$ |
|-----|----------|-----------|----------|
| 10  | $2^{21}$ | 141 909   | 290.26   |
| 11  | $2^{22}$ | 1 542 998 | 638.75   |
| 11  | $2^{23}$ | 567 639   | 580.80   |

- ▷ Tego typu test można rozszerzyć na trójki (OTSO), czwórki (OQSO), itd. liczb z generatora (G. Marsaglia, 1993; patrz np. DIEHARD: <http://www.stat.fsu.edu/pub/diehard/>).

## Test Kołmogorowa–Smirnowa (test K–S)

► Test K–S służy do weryfikacji hipotezy, że zmienna losowa  $X$  ma rozkład o danej ciągłej dystrybuancie  $F$ . Statystyka testu opiera się na różnicy między hipotetyczną dystrybuantą  $F$  a dystrybuantą empiryczną  $F_n$  z próby  $X_1, X_2, \dots, X_n$ .

● Statystyka testowa:

$$D_n = \sup_{-\infty < x < +\infty} |F_n(x) - F(x)|, \quad \text{gdzie: } F_n(x) = \frac{1}{n} \sum_{j=1}^n \Theta(x - X_j).$$

► Jeżeli próba pochodzi z rozkładu o dystrybuancie  $F$ , to  $D_n \rightarrow 0$  z prawdopodobieństwem 1.

→ Duże wartości statystyki  $D_n$  przemawiają przeciwko wyjściowej hipotezie!

▷ Wartości krytyczne testu  $D_n(\alpha)$  dla danego poziomu istotności  $\alpha$ , tzn.

$$\mathcal{P}_F\{D_n > D_n(\alpha)\} = \alpha$$

można znaleźć w tablicach statystycznych (nie zależą od postaci funkcji  $F$ ).

► Dla rozkładu  $\mathcal{U}(0, 1)$  dystrybuanta wynosi:

$$F(x) = x, \quad 0 < x < 1.$$

## Test K–S: obliczenia praktyczne

- Spostrzeżenie:**

Dystrybuanta empiryczna  $F_n$  jest funkcją schodkową i  $\sup_{-\infty < x < +\infty} |F_n(x) - F(x)|$  osiągane jest w jednym z jej punktów skoku.

⇒ Liczby  $X_1, X_2, \dots, X_n$  można posortować i wykonać obliczenia wg. wzorów:

$$D_n^+ = \max_{1 \leq i \leq n} \left( \frac{i}{n} - F(X_{i:n}) \right), \quad D_n^- = \max_{1 \leq i \leq n} \left( F(X_{i:n}) - \frac{i-1}{n} \right),$$

$$D_n = \max\{D_n^+, D_n^-\}$$

gdzie  $X_{i:n}$  – statystyka pozycyjna, tzn.  $X_{1:n} \leq X_{2:n} \leq \dots \leq X_{n:n}$ .

► Statystyki  $D_n^+$  i  $D_n^-$  mają identyczne rozkłady, które asymptotycznie ( $n \gtrsim 80$ ) osiągają:

$$\lim_{n \rightarrow \infty} \mathcal{P}\{\sqrt{n}D_n^\pm \leq t\} = 1 - e^{-2t^2}, \quad t > 0.$$

► Statystyka  $D_n$  asymptotycznie ( $n \gtrsim 80$ ) osiąga rozkład  $\lambda$ -Kolmogorowa:

$$\lim_{n \rightarrow \infty} \mathcal{P}\{\sqrt{n}D_n \leq t\} = K(t) \equiv \sum_{j=-\infty}^{\infty} (-1)^j e^{-2j^2 t^2}, \quad t > 0,$$

którego wartości krytyczne  $\lambda_\alpha$  ( $\mathcal{P}\{\sqrt{n}D_n > \lambda_\alpha\} = \alpha$ ) można znaleźć w tablicach statystycznych.

→ Często używane wartości, to:  $\lambda_{0.1} = 1.224$ ,  $\lambda_{0.05} = 1.358$ ,  $\lambda_{0.01} = 1.628$ .



## Ogólny schemat

Niech:  $y = h(x_1, x_2, \dots, x_m)$  – funkcja określona na kostce  $(0, 1)^m$ , będąca zmienną losową, jeżeli jej argumenty są niezależnymi zmiennymi losowymi  $\in \mathcal{U}(0, 1)$ .

► Z liczb otrzymywanych z generatora tworzymy ciąg:

$$Y_j = h(X_{(j-1)m+1}, X_{(j-1)m+2}, \dots, X_{jm}), \quad j = 1, 2, \dots$$

i weryfikujemy hipotezę, że jest on próbką prostą z populacji o dystrybuancie:

$$G(y) = \mathcal{P}\{Y_j \leq y\}.$$

## Testy oparte na statystykach pozycyjnych

Bierzemy funkcje postaci:

$$u = \max\{x_1, \dots, x_m\}, \quad v = \min\{x_1, \dots, x_m\}, \quad r = u - v.$$

► Rozkłady odpowiednich zmiennych losowych  $U_j$ ,  $V_j$  i  $R_j$  dane są:

$$\mathcal{P}\{U_j \leq u\} = u^m, \quad 0 \leq u \leq 1; \quad \mathcal{P}\{V_j \leq v\} = 1 - (1 - v)^m, \quad 0 \leq v \leq 1;$$

$$\mathcal{P}\{R_j \leq r\} = mr^{m-1} - (m - 1)r^m, \quad 0 \leq r \leq 1.$$

▷ Weryfikujemy hipotezy o zgodności rozkładów zmiennych  $U_j$ ,  $V_j$  i  $R_j$ , obliczanych w oparciu o generowane ciągi liczb  $X_{(j-1)m+1}, \dots, X_{jm}$  z powyższymi rozkładami teoretycznymi.

→ Zwykle testy przeprowadza się dla kilku wartości  $m = 2, 3, \dots, 10$ .

## Test sum

- Funkcja  $h$  ma postać:

$$y = x_1 + x_2 + \dots + x_m.$$

- ▶ Odpowiednie zmienne losowe  $Y_j$  mają rozkład o gęstości prawdopodobieństwa:

$$g_m(y) = \begin{cases} \frac{1}{m-1} [y^{m-1} - \binom{m}{1}(y-1)^{m-1} + \binom{m}{2}(y-2)^{m-1} - \dots] & \text{dla } 0 \leq y \leq m, \\ 0 & \text{poza tym,} \end{cases}$$

gdzie sumowanie wykonuje się dopóki  $y, y-1, y-2, \dots$  są dodatnie.

- ▷ Dla  $m = 2 \rightarrow$  rozkład trójkątny o gęstości:

$$g_2(y) = \begin{cases} y & \text{dla } 0 \leq y \leq 1, \\ 2 - y & \text{dla } 1 \leq y \leq 2. \end{cases}$$

- ▷ Dla  $m = 3 \rightarrow$  rozkład o gęstości:

$$g_3(y) = \begin{cases} \frac{1}{2}y^2 & \text{dla } 0 \leq y \leq 1, \\ \frac{1}{2} [y^2 - 3(y-1)^2] & \text{dla } 1 \leq y \leq 2, \\ \frac{1}{2} [y^2 - 3(y-1)^2 + 3(y-2)^2] & \text{dla } 2 \leq y \leq 3. \end{cases}$$

- ▶ Dla dużych  $m$  rozkład sum przybliża się rozkładem normalnym (na podstawie CTG).

## Test $d^2$

- Dla  $m = 4$  definiujemy funkcję  $h$  w postaci:

$$y = (x_1 - x_3)^2 + (x_2 - x_4)^2,$$

tzn. jest to kwadrat odległości między punktami  $(x_1, x_2)$  i  $(x_3, x_4)$  w kwadracie  $(0, 1)^2$ .

- ▶ Jeżeli niezależne zmienne losowe  $X_1, X_2, X_3, X_4 \in \mathcal{U}(0, 1)$ , to zmienna losowa

$$d^2 = (X_1 - X_3)^2 + (X_2 - X_4)^2$$

ma rozkład dany wzorem:

$$\mathcal{P}\{d^2 \leq y\} = \begin{cases} \pi y - \frac{8}{3} y^{\frac{3}{2}} + \frac{1}{2} y^2 & \text{dla } 0 \leq y \leq 1, \\ \frac{1}{3} + (\pi - 2)y + 4(y - 1)^{\frac{1}{2}} + \frac{8}{3}(y - 1)^{\frac{3}{2}} & \\ -\frac{1}{2} y^2 - 4y \arccos(y^{\frac{1}{2}}) & \text{dla } 1 \leq y \leq 2. \end{cases}$$

- ▷ Testowanie generatora polega na weryfikacji zgodności rozkładu statystyki  $d^2$  obliczanej dla liczb przez niego generowanych z powyższym rozkładem teoretycznym.

## Test urodzin odstępów

- Niech ciąg liczb pseudolosowych z generatora:  $I_1, I_2, \dots, I_m \in \{1, 2, \dots, n\}$ .  
 → Sortujemy powyższy ciąg w ciąg niemalejący:  $I_{1:m}, I_{2:m}, \dots, I_{m:m}$ ,  
 a następnie tworzymy ciąg **odstępów**:

$$I_{1:m}, I_{2:m} - I_{1:m}, I_{3:m} - I_{2:m}, \dots, I_{m:m} - I_{m-1:m}.$$

- Niech:  $Y$  – liczba odstępów, które występują więcej niż raz w powyższym ciągu.  
 ▶ Jeżeli  $I_1, \dots, I_m \in \{1, 2, \dots, n\}$  – niezależne zmienne losowe o rozkładzie równomiernym na zbiorze  $\{1, 2, \dots, n\}$ , to zmienna losowa  $Y$  ma **rozkład Poissona** z parametrem:

$$\mu = \frac{m^3}{4n}.$$

- ▷ W praktyce bierze się  $n \geq 10^4$ , a wartości  $I_j$  tworzy się z najbardziej znaczących bitów liczb z generatora.

→ Tego testu nie spełniają zwykle generatory Fibonacciego typu:  $F(r, s, \pm)$  i  $F(r, s, \text{xor})$ !

¶ **Dygresja** – rozkład Poissona  $P(\mu)$ :

$$\mathcal{P}[X = k] = \frac{\mu^k}{k!} e^{-\mu}, \quad k = 0, 1, \dots; \quad E(k) = V(k) = \mu.$$

## Test najmniejszej odległości w parach

Generujemy  $n$  punktów z kostki  $(0, 1)^m$ . Bierzemy  $\binom{n}{2}$  par punktów i obliczamy odległość Euklidesową między punktami każdej pary.

Niech  $D$  – najmniejsza odległość między parami punktów  $\rightarrow$  dla równomiernego rozkładu liczb z generatora zmienna losowa:  $T = n^2 D^m / 2$  ma asymptotycznie rozkład wykładniczy ze średnią:  $1/V_m$ , gdzie  $V_m$  – objętość  $m$ -wymiarowej kuli jednostkowej.

### Schemat testu:

- Generujemy  $Nn$  punktów w kostce  $(0, 1)^m$ , uzyskując  $N$  realizacji statystyki  $T$ .
- Porównujemy rozkład empiryczny  $T$  z rozkładem wykładniczym, np. stosując test K–S lub test chi-kwadrat.

▷ Uwaga: Aby jakość testu była dobra, wartości  $N$ ,  $n$  i  $m$  powinny być odpowiednio dobrane!

▶ Przykładowe wartości parametrów:

- 1)  $N = 100$ ,  $n = 10^5$ ,  $m = 4$ ;
- 2)  $N = 20$ ,  $n = 10^5$ ,  $m = 6$ ;
- 3)  $N = 20$ ,  $n = 5 \cdot 10^4$ ,  $m = 9$ .

▷ Generatory liniowe zwykle nie spełniają tego testu, gdyż tworzą regularne siatki w  $\mathbb{R}^m$ .

¶ **Dygresja** – rozkład wykładniczy  $E(\lambda)$ :  $\rho_\lambda(X) = \lambda e^{-\lambda X}$ ,  $x \geq 0$ ,  $E(X) = \sigma(X) = 1/\lambda$ .

Niech  $X$  – zmienna losowa o rozkładzie danym dystrybuantą  $F$ . Zbiór wartości tej zmiennej dzielimy na dwa rozłączne podzbiory  $A$  i  $B$  i definiujemy zmienną losową  $Y$  o wartościach  $a$  i  $b$ :

$$Y = \begin{cases} a & \text{gdy } X \in A, \\ b & \text{gdy } X \in B. \end{cases}$$

Ciąg liczb losowych  $X_1, X_2, \dots, X_N$  przekształcamy w ciąg  $Y_1, Y_2, \dots, Y_N \in \{a, b\}$ .

► **Seria** – każdy odcinek ciągu złożony z maksymalnej liczby kolejnych jednakowych elementów.

▷ Np. dla ciągu:  $a, a, b, a, b, b, b, a, b, b, b$  mamy następujące serie:  $aa, b, a, bbb, a, bbb$ .

Niech  $n_a$  – liczba symboli  $a$  w danym ciągu  $Y_1, Y_2, \dots, Y_N$ , a  $n_b = N - n_a$  – liczba symboli  $b$ .

⇒ Rozkład liczby serii  $R$  przy tym warunku dany jest wzorem:

$$\mathcal{P}\{R = r | n_a, n_b\} = \begin{cases} 2 \binom{n_a-1}{k-1} \binom{n_b-1}{k-1} / \binom{N}{n_a} & \text{gdy } r = 2k, \\ \left[ \binom{n_a-1}{k} \binom{n_b-1}{k-1} + \binom{n_a-1}{k-1} \binom{n_b-1}{k} \right] / \binom{N}{n_a} & \text{gdy } r = 2k + 1. \end{cases}$$

⇒ Rozkład bezwarunkowy liczby serii  $R$ :

$$\mathcal{P}\{R = r\} = \sum_{n_a=0}^{n_a+n_b} \mathcal{P}\{R = r | n_a, n_b\} \binom{n_a + n_b}{n_a} p^{n_a} (1 - p)^{n_b}, \quad p \equiv \mathcal{P}\{Y = a\}.$$

## Obliczenia praktyczne

**Weryfikacja hipotezy o niezależności zmiennych**  $X_1, X_2, \dots, X_N$ :

- Dla ustalonego poziomu istotności  $\alpha$  należy znaleźć dwie wartości krytyczne  $R_1$  i  $R_2$ :

$$\mathcal{P}\{R < R_1\} = \mathcal{P}\{R > R_2\} = \frac{\alpha}{2}.$$

- Liczby  $R_1$  i  $R_2$  otrzymujemy rozwiązując równania:

$$\sum_{j=0}^{R_1-1} \mathcal{P}\{R = j\} = \frac{\alpha}{2}, \quad \sum_{j=R_2+1}^N \mathcal{P}\{R = j\} = \frac{\alpha}{2}$$

▷ Rozwiązania tych równań można znaleźć w tablicach statystycznych.

- Dla dużych  $N$  rozkład liczby serii aproksymuje się rozkładem normalnym  $N(\mu, \sigma)$ :

$$\mu = E(R) = 2Np(1-p) + p^2 + (1-p)^2,$$

$$\sigma^2 = V(R) = 4Np(1-p)[1 - 3p(1-p)] - 2p(1-p)[3 - 10p(1-p)].$$

- Jeżeli zaobserwowana liczba serii  $R < R_1$  lub  $R > R_2$ , to weryfikowaną hipotezę odrzucamy.

▶ **Test serii względem mediany**, tzn.  $A = (0, 0.5)$ ,  $B = (0.5, 1)$ ,  $p = 1/2$ :

→ Dla dużych  $N$  rozkład normalny z parametrami:  $\mu = N/2$ ,  $\sigma^2 = N/4$ .

▶ **Test serii monotonicznych**, tzn. ciągów znaków:  $\text{sign}(X_2 - X_1), \text{sign}(X_3 - X_2), \dots \in \{+, -\}$

→ Dla dużych  $N$  rozkład normalny z parametrami:  $\mu = (2N - 1)/3$ ,  $\sigma^2 = (16N - 29)/90$ .

- ▶ Testy kombinatoryczne należą do grupy tzw. **testów niezależności (losowości próby)**.

## Test pokerowy

- Przedział zmiennych losowych  $X$  dzielimy na  $k$  jednakowych podprzedziałów:

$$0 = a_0 < a_1 < \dots < a_k = 1.$$

- ▷ Dla ciągu liczb losowych  $X_1, X_2, \dots, X_n \in \mathcal{U}(0, 1)$ :

$$\mathcal{P}\{a_{i-1} < X_j \leq a_i\} = \frac{1}{k}.$$

- Tworzymy ciąg zmiennych losowych  $Y_j$  według wzoru:

$$Y_j = i, \text{ jeżeli } X_j \in (a_i, a_{i+1}), \quad i = 0, 1, \dots, k - 1.$$

- ▷ Zmienna losowa  $Y_j$  przyjmuje każdą wartość z jednakowym prawdopodobieństwem.

- Ciąg  $Y_1, Y_2, \dots$  dzielimy na piątki:

$$(Y_1, Y_2, \dots, Y_5), (Y_6, Y_7, \dots, Y_{10}), \dots$$

- ▷ Nowy ciąg jest zbudowany z  $k^5$  różnych piątek.

- Wyróżniamy następujące typy piątek:

|                 |                    |                      |                   |
|-----------------|--------------------|----------------------|-------------------|
| $abcde$ (bust), | $aabcd$ (para),    | $aabbc$ (dwie pary), | $aaabc$ (trójka), |
| $aaabb$ (full), | $aaaab$ (czwórka), | $aaaaa$ (piątka).    |                   |



## Test pokerowy – rozkłady

Jeżeli  $X_1, X_2, \dots, X_n \in \mathcal{U}(0, 1)$  – niezależne zmienne losowe, to rozkłady poszczególnych typów piątek dane są wzorami:

$$\mathcal{P}\{(abcde)\} = \frac{(k-1)(k-2)(k-3)(k-4)}{k^4}, \quad k \geq 5,$$

$$\mathcal{P}\{(aabcd)\} = \frac{10(k-1)(k-2)(k-3)}{k^4}, \quad k \geq 4,$$

$$\mathcal{P}\{(aabbc)\} = \frac{15(k-1)(k-2)}{k^4}, \quad k \geq 3,$$

$$\mathcal{P}\{(aaabc)\} = \frac{10(k-1)(k-2)}{k^4}, \quad k \geq 3,$$

$$\mathcal{P}\{(aaabb)\} = \frac{10(k-1)}{k^4}, \quad k \geq 3,$$

$$\mathcal{P}\{(aaaab)\} = \frac{5(k-1)}{k^4}, \quad k \geq 2,$$

$$\mathcal{P}\{(aaaaa)\} = \frac{1}{k^4}, \quad k \geq 1,$$

▷ W praktyce najczęściej używa się wartości  $k = 2, 8, 10$ .

► Zgodność rozkładu piątek różnych typów sprawdza się przy pomocy testu chi-kwadrat.

## Test kolekcjonera

- Tworzymy ciąg  $Y_1, Y_2, \dots$ , jak dla testu pokerowego.
- Obserwujemy ten ciąg aż pojawią się w nim wszystkie  $k$  liczby:  $0, 1, \dots, k - 1$ .
- ▶ Długość zaobserwowanego odcinka ciągu  $R$  ma rozkład:

$$\mathcal{P}\{R = r\} = \frac{1}{k^{r-1}} \sum_{j=0}^{k-2} (-1)^j \binom{k-1}{j} (k-1-j)^{r-1}, \quad r = k, k+1, \dots$$

- ▷ Zgodność rozkładu zaobserwowanego w powyższym rozkładem teoretycznym weryfikuje się przy użyciu standardowego testu chi-kwadrat.

## Test permutacji

- Bierzemy ciąg  $k$ -wymiarowych punktów utworzony z  $nk$  kolejnych liczb z generatora:

$$(X_1, X_2, \dots, X_k), (X_{k+1}, \dots, X_{2k}), \dots, (X_{k(n-1)+1}, \dots, X_{nk})$$

i każdy z punktów przekształcamy zastępując współrzędne ich **rangami** (tzn. numerami porządkowymi w kolejności rosnącej wartości współrzędnych).

- ▶ Każda permutacja  $(n_1, n_2, \dots, n_k)$  liczb  $(1, 2, \dots, k)$  jest jednakowo prawdopodobna.
- ▷ Powyższą hipotezę weryfikuje się standardowym testem chi-kwadrat.

## Test kolizji

- Bierzemy ciąg utworzony z  $nk$  kolejnych liczb z generatora:

$$(X_1, X_2, \dots, X_k), (X_{k+1}, \dots, X_{2k}), \dots, (X_{k(n-1)+1}, \dots, X_{nk}).$$

- Kostkę  $(0, 1)^k$  dzielimy na  $m = s^k$  jednakowych  $k$ -wymiarowych kostek o objętościach  $1/m$ .
- Za statystykę testową przyjmujemy **liczbę kolizji**  $C$ , tzn. liczbę przypadków, w których kolejny punkt wpada do kostki zajętej już przez co najmniej jeden punkt.
- Jeżeli  $X_1, X_2, \dots, X_n \in \mathcal{U}(0, 1)$  – niezależne zmienne losowe, to statystyka  $C$  ma rozkład:

$$\mathcal{P}\{C = c\} = \frac{m(m-1)\dots(m-n-c+1)}{m^n} \binom{n}{n-c}, \quad c = 0, 1, \dots, n.$$

- ▷ Do weryfikacji zgodności rozkładu zaobserwowanego w powyższym rozkładem teoretycznym używa się testu chi-kwadrat.

## Test pustych komórek (test Davida–Hellwiga)

- ▶ Statystyka  $C'$  – liczba pustych komórek, tzn. kostek, w których nie ma ani jednego punktu.  
 ⇒ Rozkład prawdopodobieństwa:

$$\mathcal{P}\{C' = c\} = \binom{m}{c} \sum_{i=0}^{m-c} (-1)^i \binom{m-c}{i} \left[1 - \frac{c+i}{m}\right]^m, \quad c = 0, 1, \dots, m.$$

- ▷ Wartości dystrybuanty oraz wartości krytyczne można znaleźć w tablicach statystycznych.

► Testowanie generatorów za pomocą **zadań kontrolnych** – rozwiązywanie określonych zadań metodami Monte Carlo i porównywanie wyników z wynikami otrzymywanymi w inny sposób.

- Wyznaczanie liczby  $\pi$ , np. metodą igły Buffona lub trafiania w ćwiartkę jednostkowego koła zawartą w jednostkowym kwadracie.
- Obliczanie znanych całek metodami Monte Carlo.
- Obliczanie objętości kuli jednostkowej w przestrzeni  $m$ -wymiarowej:

$$V_m = \frac{2\pi^{\frac{m}{2}}}{m \Gamma\left(\frac{m}{2}\right)}, \quad \Gamma(x+1) = x\Gamma(x), \quad \Gamma(1) = 1, \quad \Gamma(1/2) = \sqrt{\pi} \quad (\text{funkcja } \Gamma\text{-Eulera}).$$

▷ Można zastosować metodę „orzeł–reszka” generując punkty losowe w kostce  $(-1, 1)^m$ .

- Wyznaczanie parametrów pewnych zjawisk fizycznych, których ścisłe rozwiązania są znane (np. ruchy Browna na płaszczyźnie).

⇒ **Ćw. N7.1:** Wykonać następujące testy zaimplementowanych generatorów liczb losowych:

(a) Test chi-kwadrat, np. dla  $k = 10$ .

(b) Jeden z testów zgodności z rozkładem wielowymiarowym, np. dla  $m = 3$ .

(c) Test Kołmogorowa–Smirnowa.

(d) Po jednym z testów: zgodności rozkładów statystyk, serii oraz kombinatorycznych.

(e) Objętości kuli  $m$ -wymiarowej dla kilku wartości  $m$  (wyliczać też odchylenie standardowe).

⇒ **Ćw. N3\*** (nadobowiązkowe): Zaimplementować i wykonać test OPSO.
